# Supplementary material for: Matrix effects in MI-VCD spectra of two chiral oxiranes and their potential microscopic origin
Source: Royal Society of Chemistry journal article supplement (doi:10.1039/d3cp05023h), 2023-01-01
Supplement: d3cp05023h1.pdf [file d3cp05023h1.pdf]

Supporting information for

# Matrix effects in MI-VCD spectra of two chiral oxiranes and their potential microscopic origin

Corentin Grassin, Corina H. Pollok, Nora M. Kreienborg, and Christian Merten\*

Ruhr Universität Bochum  
Fakultät für Chemie und Biochemie, Organische Chemie II  
Universitätsstraße 150  
44801 Bochum, Germany  
christian.merten@ruhr-uni-bochum.de  
[www.mertenlab.de](http://www.mertenlab.de)

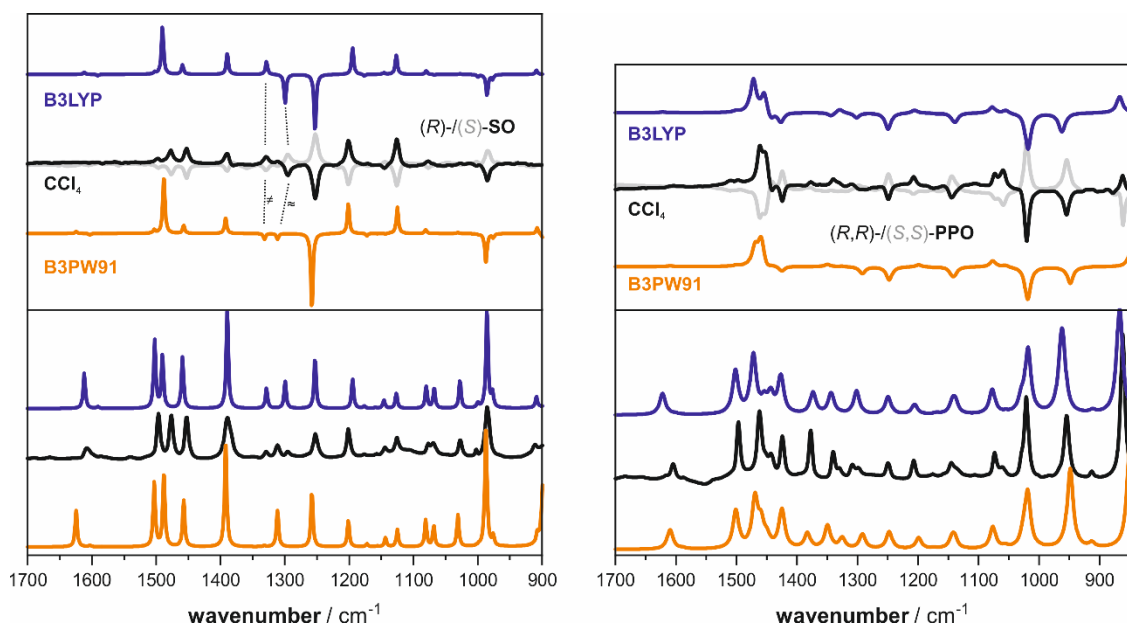

**Figure S1.** Comparison of the experimental solution phase spectra of **SO** (left) and **PPO** (right) with the corresponding computed spectra obtained with the B3LYP and B3PW91 functionals, the 6-311G++(2d,p) basis set, and the IEFPCM(carbon tetrachloride).

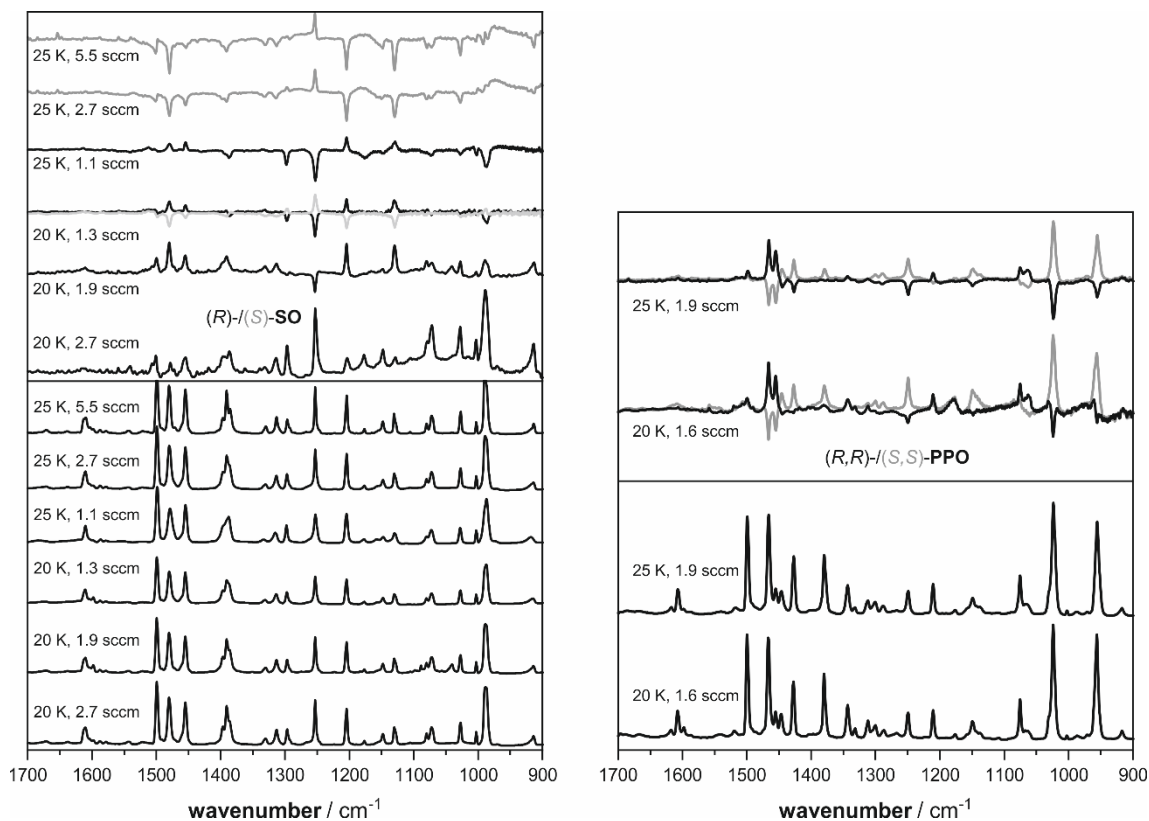

**Figure S2.** Experimental spectra of **SO** and **PPO** in N<sub>2</sub>-matrix

## Cartesian coordinates of SO and PPO

### (R)-SO

|   |             |             |             |
|---|-------------|-------------|-------------|
| C | 1.59730700  | 0.57761100  | 0.19120400  |
| C | 2.58870300  | 0.00899200  | -0.73890300 |
| O | 2.49081900  | -0.46483000 | 0.60747400  |
| H | 1.82945400  | 1.54921500  | 0.62210700  |
| H | 3.49343400  | 0.56475800  | -0.96976000 |
| H | 2.25065700  | -0.68943900 | -1.49920500 |
| C | 0.14560300  | 0.25831300  | 0.10751200  |
| C | -0.78468600 | 1.29717800  | 0.05421800  |
| C | -0.30730600 | -1.06144300 | 0.07266700  |
| C | -2.14401800 | 1.02414600  | -0.05239900 |
| H | -0.44341800 | 2.32615400  | 0.09745700  |
| C | -1.66638700 | -1.33384100 | -0.02864000 |
| H | 0.41127000  | -1.86863000 | 0.14504100  |
| C | -2.58862100 | -0.29316900 | -0.09556200 |
| H | -2.85587200 | 1.84006700  | -0.09444800 |
| H | -2.00786900 | -2.36216100 | -0.04902500 |
| H | -3.64777300 | -0.50804600 | -0.17254500 |

### (R,R)-PPO

|   |             |             |             |
|---|-------------|-------------|-------------|
| C | 2.49439600  | -1.14873600 | -0.06956200 |
| C | 1.13770200  | -1.28678400 | 0.19026000  |
| C | 0.30712100  | -0.16839100 | 0.23160700  |
| C | 0.85960500  | 1.09448600  | 0.02820800  |
| C | 2.21689800  | 1.23242900  | -0.22663400 |
| C | 3.03785300  | 0.11221600  | -0.28052200 |
| H | 3.12990500  | -2.02730300 | -0.10042700 |
| H | 0.71883800  | -2.27371900 | 0.36401200  |
| H | 0.21732900  | 1.96596000  | 0.09117600  |
| H | 2.63791300  | 2.22076200  | -0.37790100 |
| H | 4.09862200  | 0.22234700  | -0.47783800 |
| C | -1.14660700 | -0.34139500 | 0.47752500  |
| H | -1.41590000 | -1.23581100 | 1.03912700  |
| C | -2.17578800 | 0.20383800  | -0.42403400 |
| H | -1.80894900 | 0.78536200  | -1.27024000 |
| C | -3.52131800 | -0.43135700 | -0.59791100 |
| H | -3.52022100 | -1.09547900 | -1.46685200 |
| H | -3.79454900 | -1.01053400 | 0.28614500  |
| H | -4.28826000 | 0.33136200  | -0.75842600 |
| O | -1.90423800 | 0.81490100  | 0.83720000  |
